# Supplementary material
Source: PubMed Central journal article supplement (PMC3530648)

# Supplementary figure S1

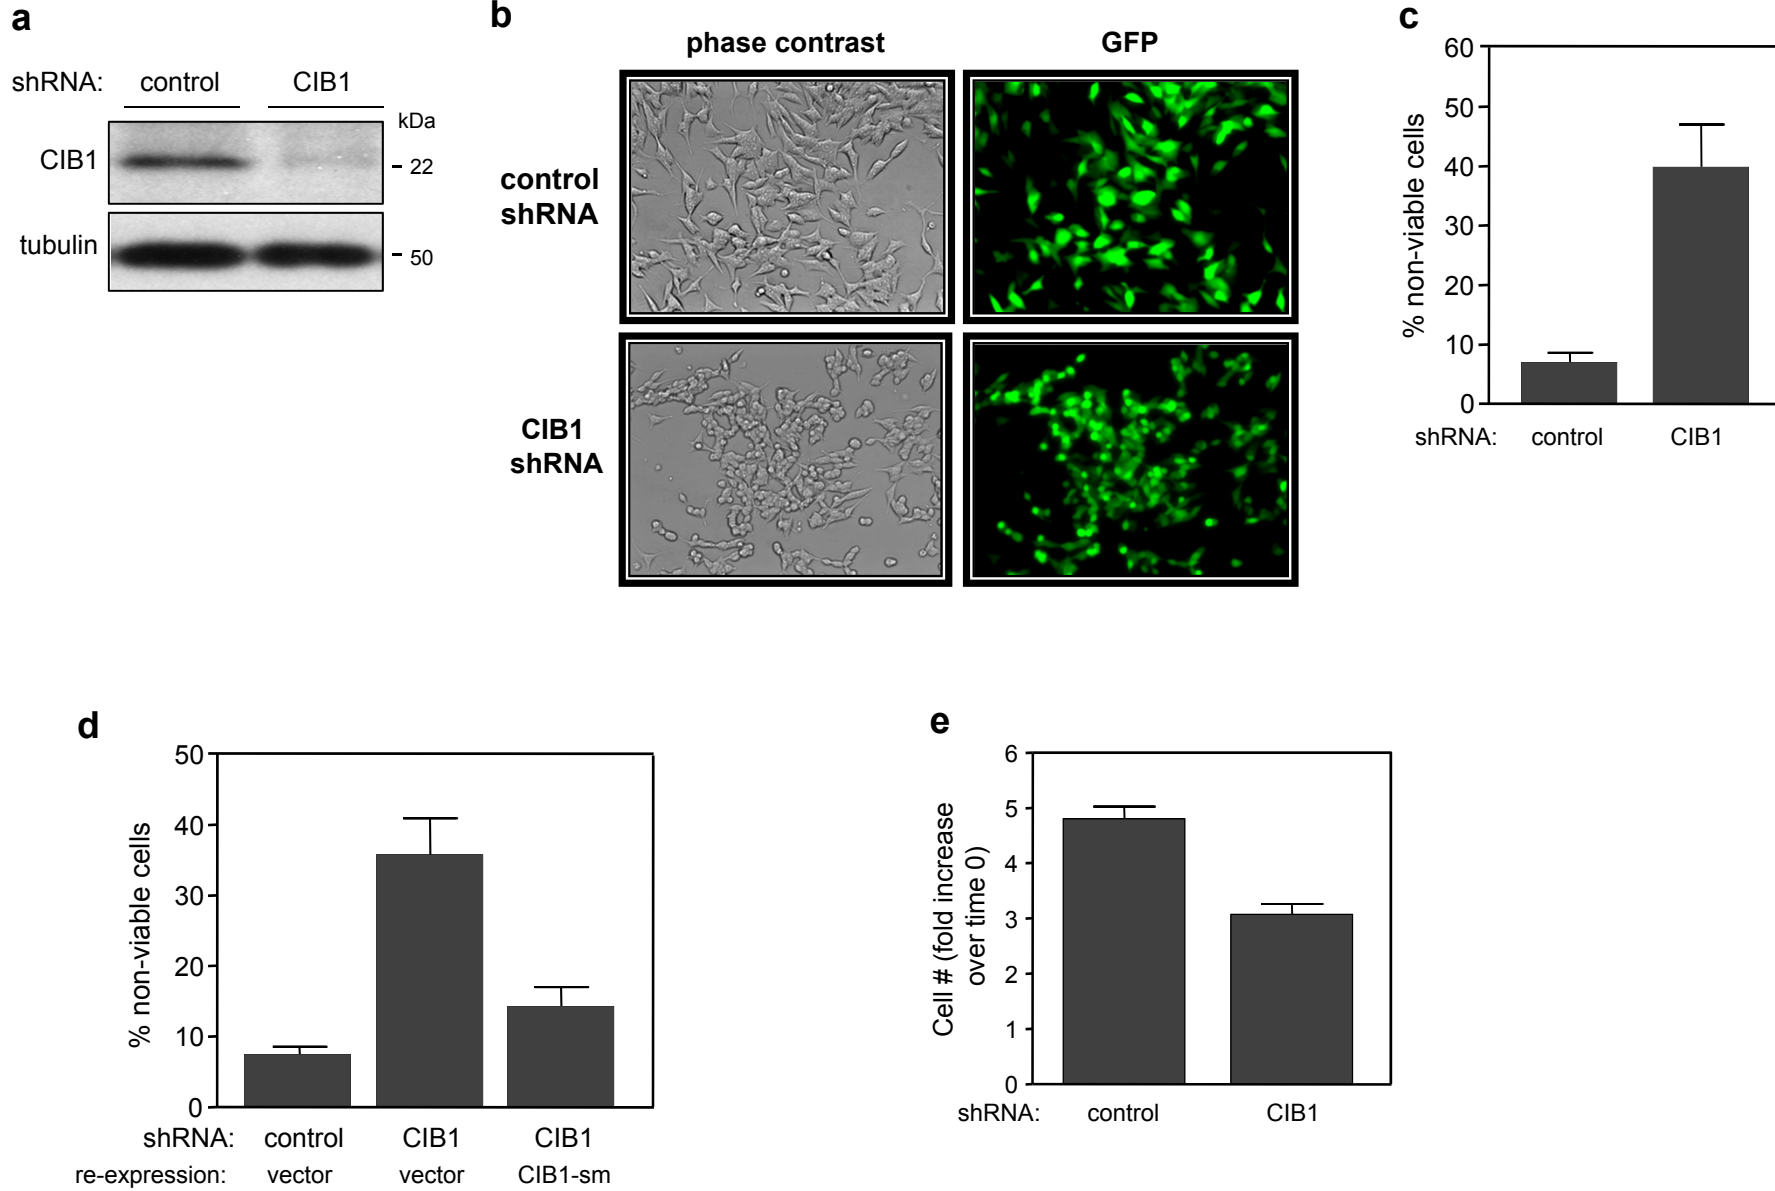

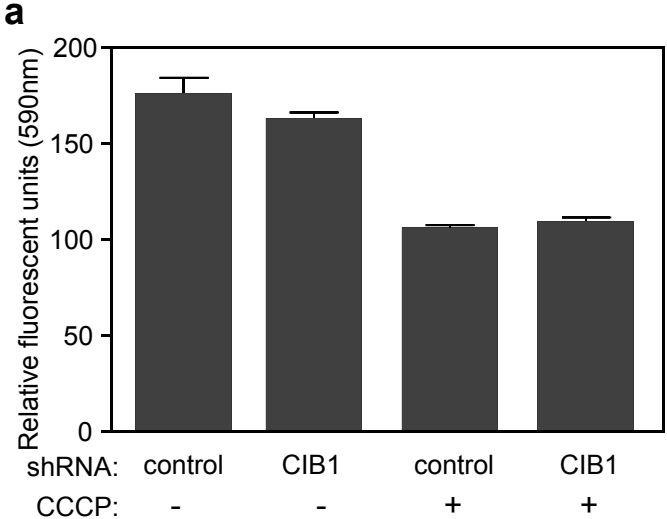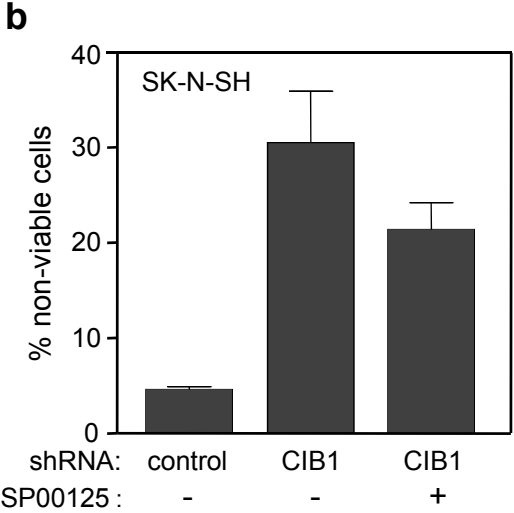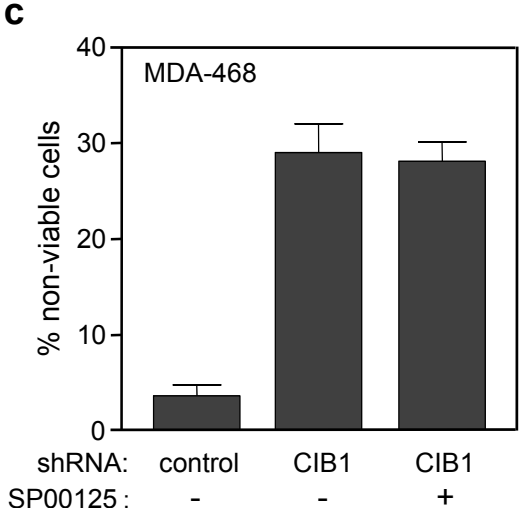

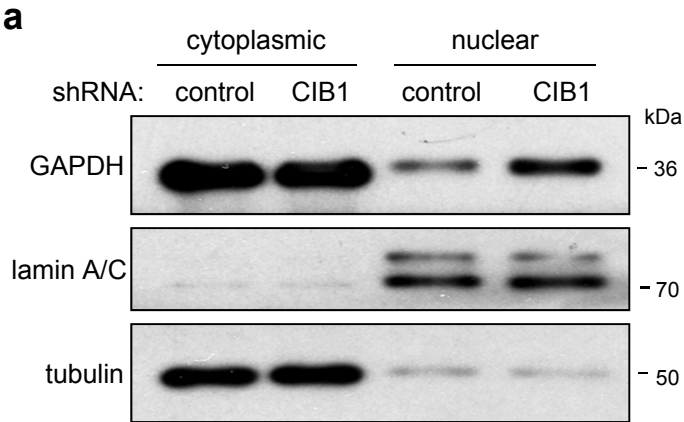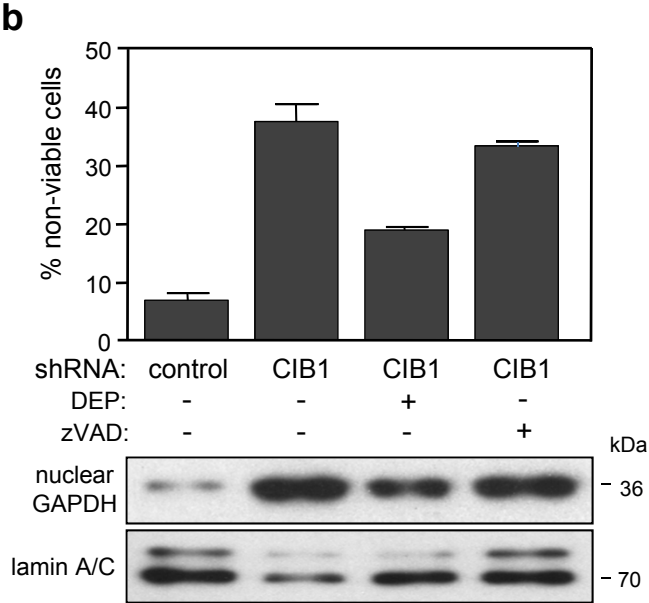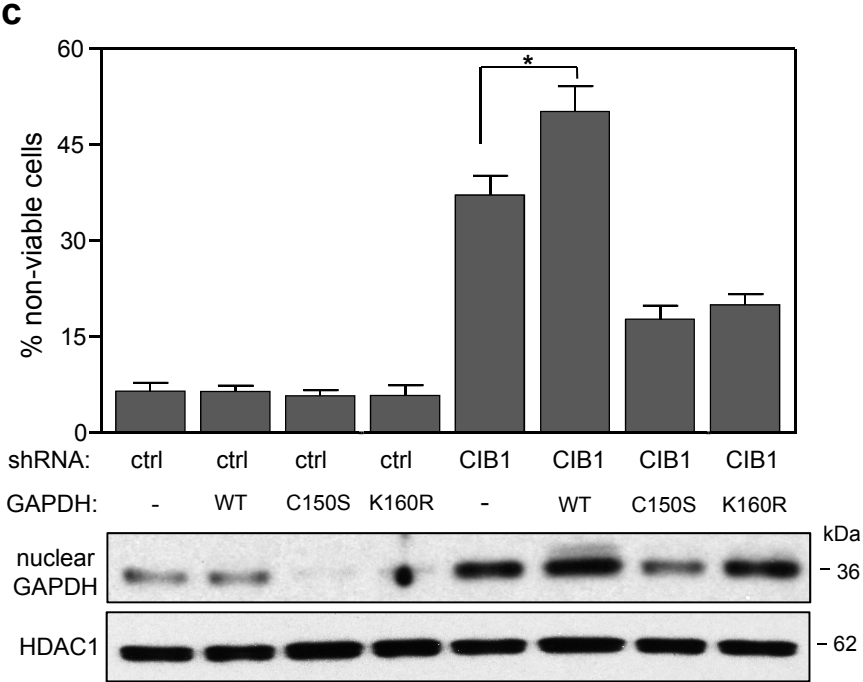

## Supplementary figure S4

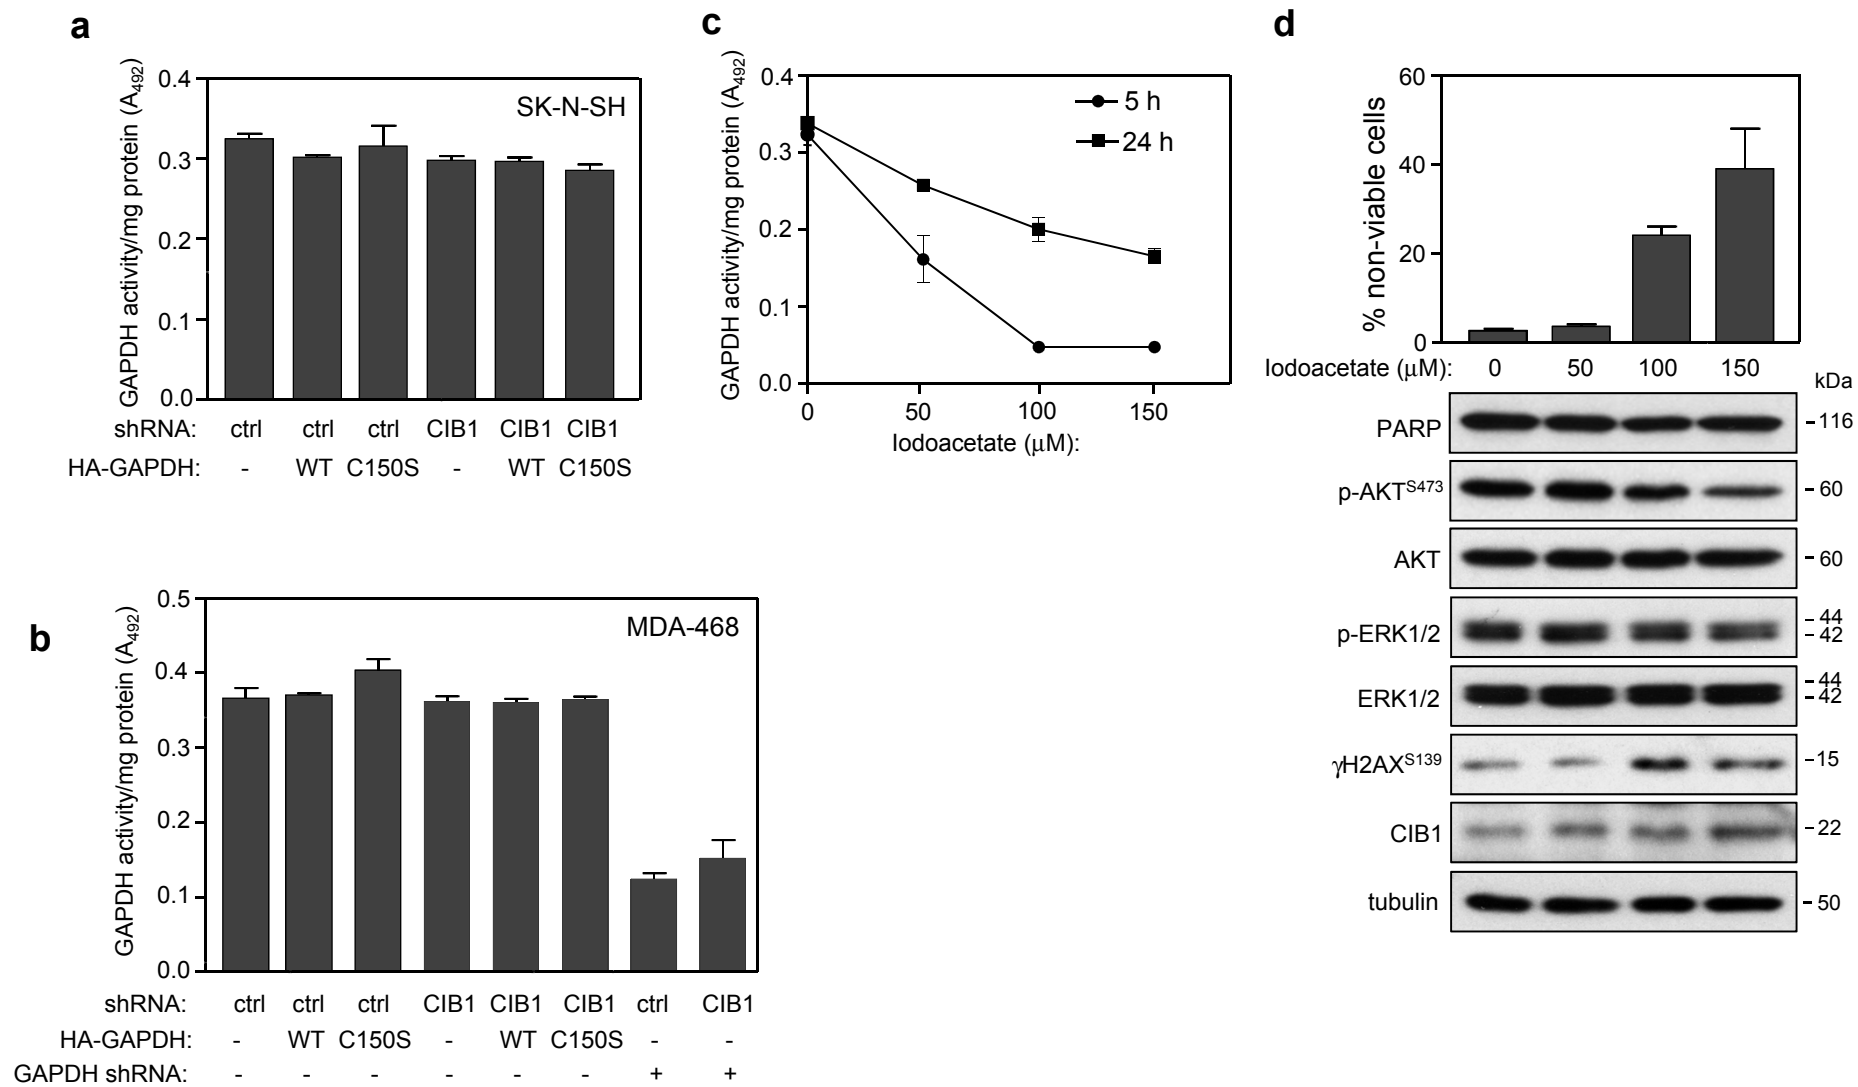

Supplementary figure S5

**a**

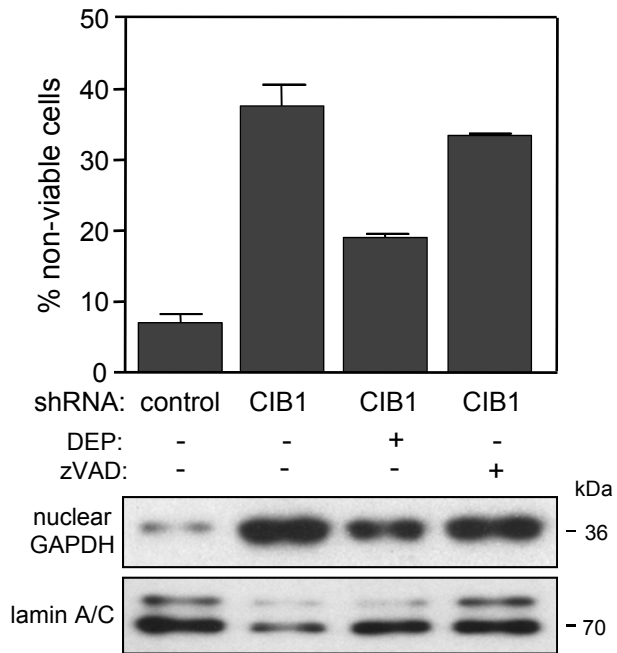

**b**

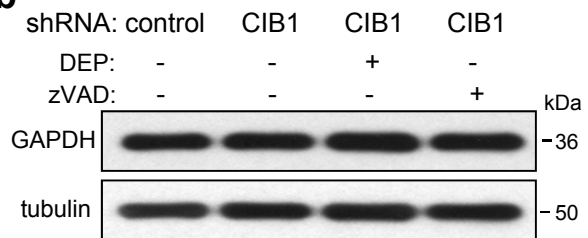

**c**

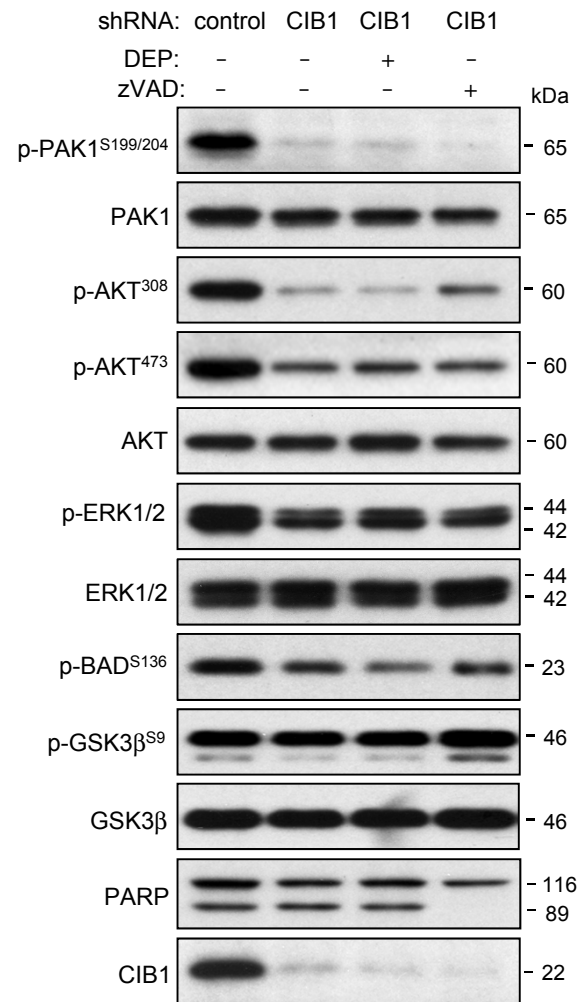

# Supplementary figure S6

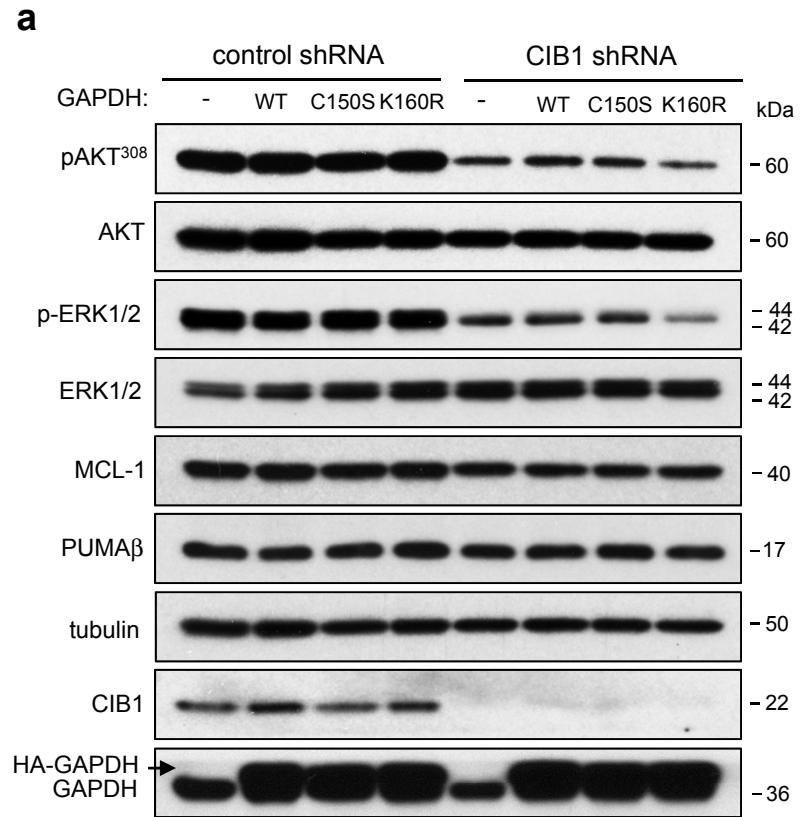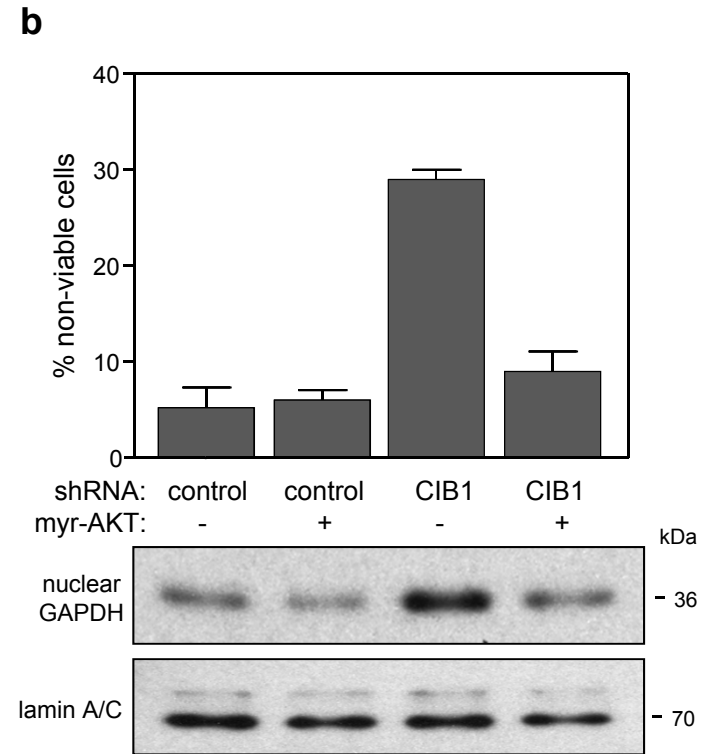

# Supplementary figure S7

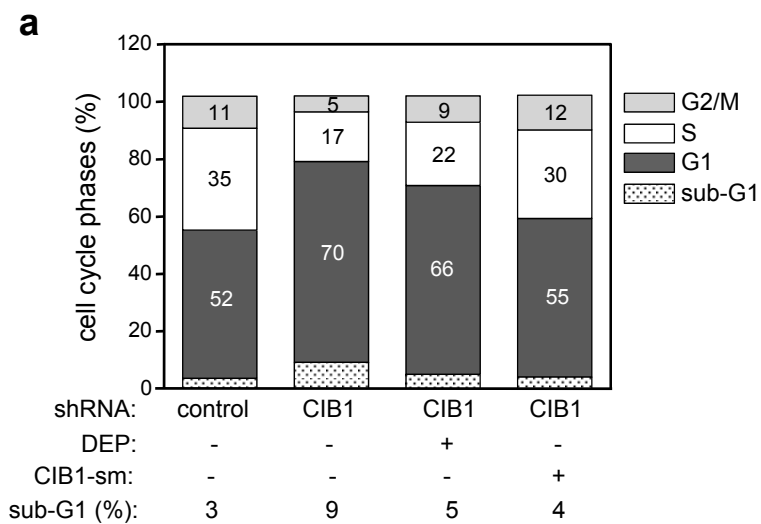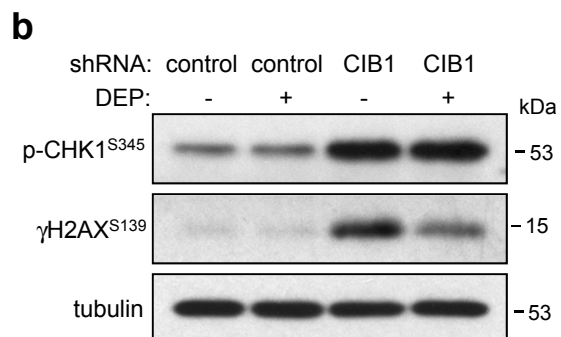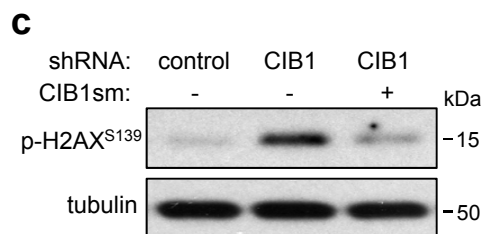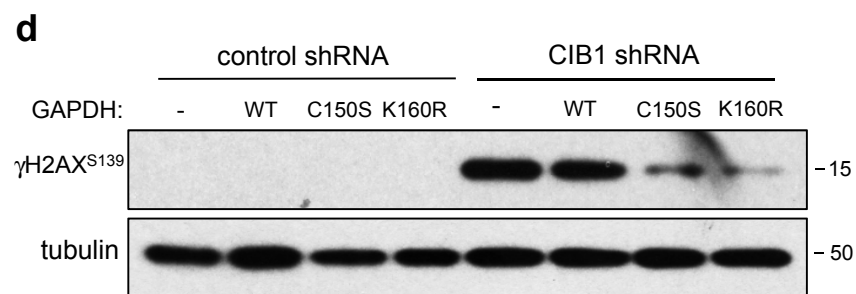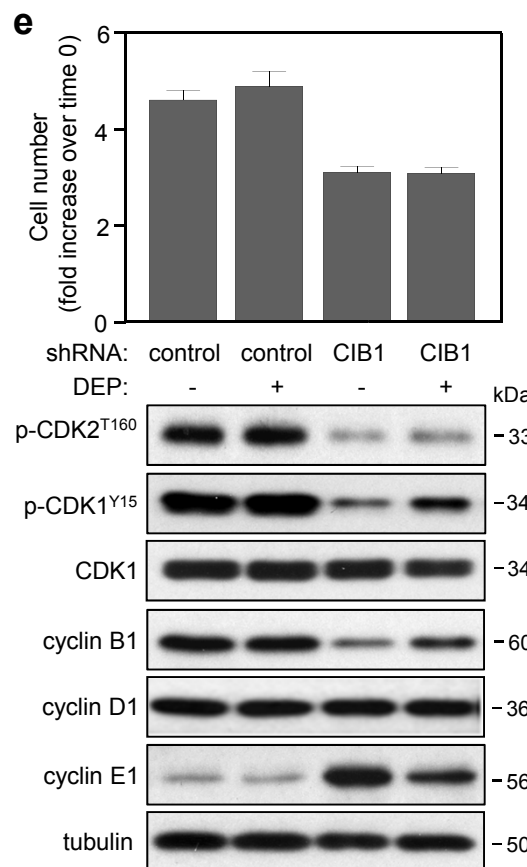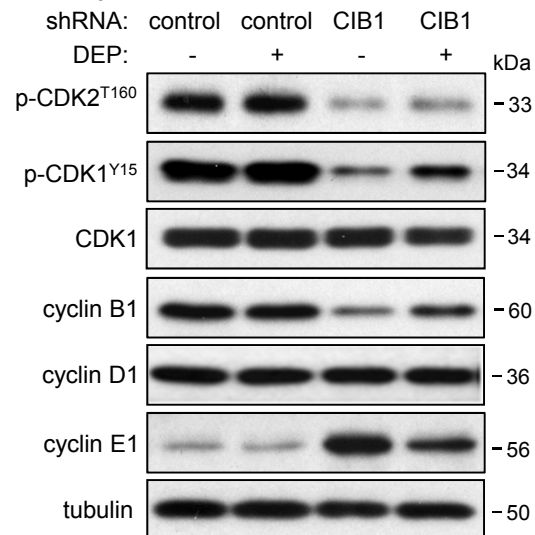

# Supplementary figure S8

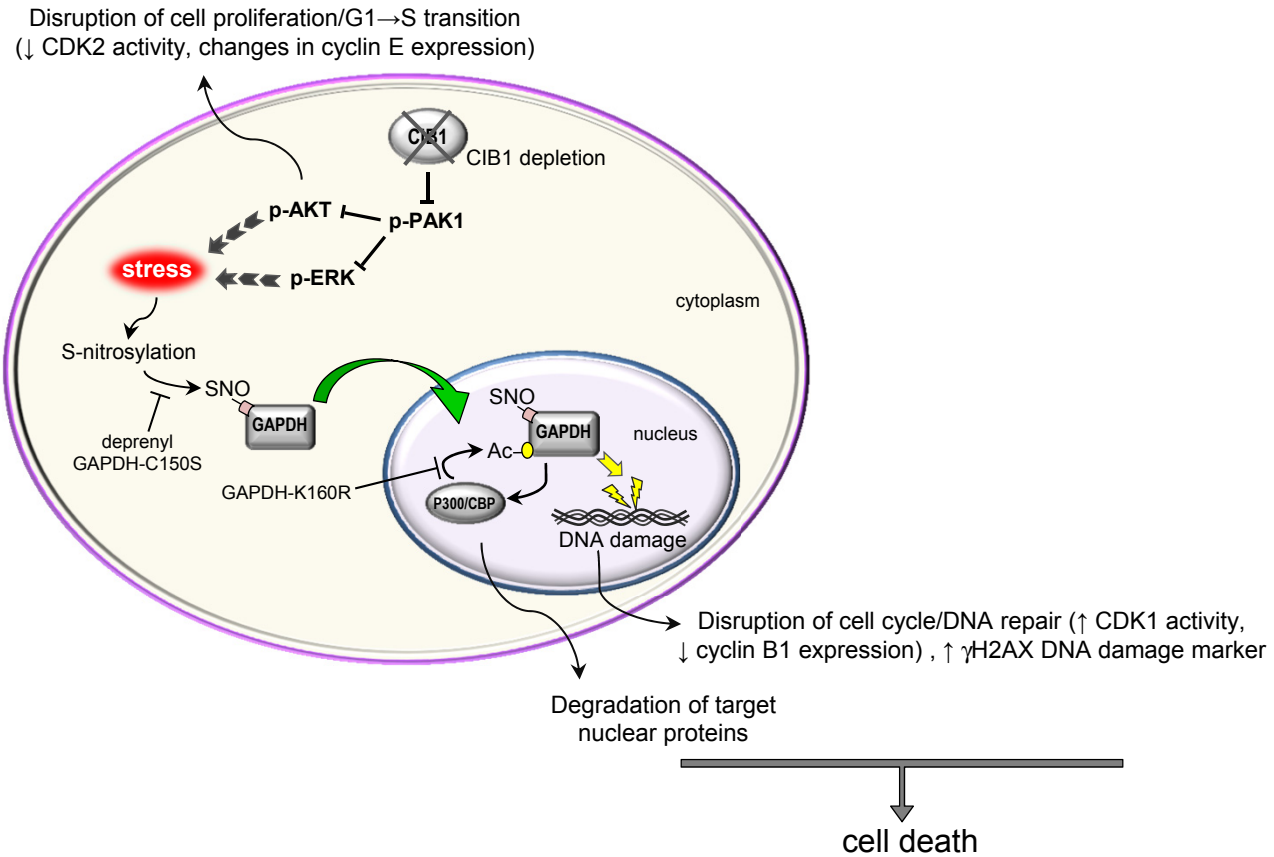

Supplement: NIHMS397505-supplement-3.pdf [file NIHMS397505-supplement-3.pdf]
